# Supplementary material
Source: PubMed Central journal article supplement (PMC1183590)
Supplement: pnas_0505011102_1.pdf [file pnas_0505011102_1.pdf]

## Oligonucleotide primers.

The following pairs of primers were used for real-time RT-PCR reactions: p21<sup>WAF1/Cip1</sup> forward (F), 5'- TCT CAT GGT GTG GTG GAA AA -3'; reverse (R), 5'- GCT GTG GCT GAA ACA CAA GA -3'; KyoT1/2 (common transcript region) F, 5'- TGT GAG GTC CCT CCA GCT AT -3'; R, 5'- AGG TGT TGG CGC AGA ACT TG -3'; KyoT1 (specific) F, 5'- GAA GTG TGC TGG ATG CAA GA -3'; R, 5'- ACA GTC AGG GCA ATA CAC CT -3'; KyoT2 (specific) F, 5'- ATT GTG GCA GGA GAC CAG AA -3'; R, 5'- TTT ACC AAA CCC TTG TTG CAC -3'; K1 F, 5'- TCG TGA CCA TCA AGA AGG AT -3'; R, 5'- ACA ACA TTG GTT TCG CTG AT -3'; K10 F, 5'- TGT GAA TGT GGA AAT GAA CG -3'; R, 5'- TGG TGA GTT CCT TGC TCT TC -3'; Filaggrin F, 5'- TGA CAG CCA AGT CCA TTC TG -3'; R, 5'- ATA TCC TCC CTG ACC ACT TG -3'; Involucrin F, 5'- GGG ACA GAA ACA GAA GCA GA -3'; R, 5'- CAG TTC TGG CTC AGG TGA CT -3'; GAPDH F, 5'- ATC ACT GCC ACC CAG AAG AC -3'; R, 5'- CAG TGA GCT TCC CGT TCA G -3'.
