# Supplementary material
Source: PubMed Central journal article supplement (PMC1183590)
Supplement: pnas_0505011102_2.pdf [file pnas_0505011102_2.pdf]

**Table 1. Genes modulated by C3 (Z score > 3 or < -3)**

| GenBank accession number       | Gene name                                                         | Gene function                                                                                                                             | Z score | Folds of induction |
|--------------------------------|-------------------------------------------------------------------|-------------------------------------------------------------------------------------------------------------------------------------------|---------|--------------------|
| <b>Growth and adhesion</b>     |                                                                   |                                                                                                                                           |         |                    |
| X15202                         | Integrin $\beta$ 1 (fibronectin receptor $\beta$ ) - <i>Itgb1</i> | Receptor activity; protein binding; oxidoreductase activity                                                                               | -3.738  | 0.346              |
| M64403                         | Cyclin D1 - <i>Ccnd1</i>                                          | Protein kinase activity; protein binding; kinase activity; cyclin-dependent protein kinase regulator activity                             | -3.479  | 0.321              |
| AI849928                       | Cyclin D1 - <i>Ccnd1</i>                                          | Protein kinase activity; protein binding; kinase activity; cyclin-dependent protein kinase regulator activity                             | -3.980  | 0.315              |
| M83749                         | Cyclin D2 - <i>Ccnd2</i>                                          | Protein binding; cyclin-dependent protein kinase regulator activity                                                                       | -5.182  | 0.191              |
| X66032                         | Cyclin B2 - <i>Ccnb2</i>                                          | Cyclin-dependent protein kinase regulator activity                                                                                        | -5.494  | 0.184              |
| AA681998                       | CDC28 protein kinase regulatory subunit 2 - <i>Cks2</i>           | Cyclin-dependent protein kinase activity                                                                                                  | -4.419  | 0.245              |
| AB025409                       | CDC28 protein kinase 1 - <i>Cks1</i>                              | Cyclin-dependent protein kinase activity; kinase activity                                                                                 | -4.928  | 0.232              |
| AI848299                       | Replication protein A3 - <i>Rpa3</i>                              | Nucleic acid binding                                                                                                                      | -3.841  | 0.287              |
| <b>Differentiation markers</b> |                                                                   |                                                                                                                                           |         |                    |
| V00830                         | Keratin complex 1, acidic, gene 10 - <i>Krt1-10</i>               | Structural molecule activity; structural constituent of cytoskeleton                                                                      | 9.108   | 10.863             |
| X97986                         | Desmocollin 1 - <i>Dsc1</i>                                       | Calcium ion binding; protein binding                                                                                                      | 7.443   | 6.886              |
| AW228162                       | Desmocollin 2 - <i>Dsc2</i>                                       | Calcium ion binding; protein binding                                                                                                      | 5.166   | 3.895              |
| Y11169                         | Desmocollin 3 - <i>Dsc3</i>                                       | Calcium ion binding; protein binding                                                                                                      | 3.591   | 2.460              |
| AJ005564                       | Small proline-rich protein 2F - <i>Sprr2f</i>                     | Structural molecule activity                                                                                                              | 3.234   | 2.214              |
| J03458                         | Filaggrin -                                                       | Cytoskeleton organization and biogenesis                                                                                                  | 5.124   | 3.535              |
| L10385                         | Transglutaminase 3, E polipeptide - <i>Tgm3</i>                   | Protein-glutamine $\gamma$ -glutamyltransferase activity; calcium ion binding; acyltransferase activity; transferase activity             | 10.261  | 18.694             |
| <b>Transcription factors</b>   |                                                                   |                                                                                                                                           |         |                    |
| X12761                         | Jun oncogene - <i>Jun</i>                                         | DNA binding; transcription factor activity; protein binding                                                                               | 3.788   | 2.658              |
| AF006602                       | Histone deacetylase 5 - <i>Hdac5</i>                              | Transcription corepressor activity; histone deacetylase activity; protein binding; transcriptional repressor activity; hydrolase activity | 3.576   | 2.460              |
| U41739                         | Four and a half LIM domains 1 - <i>Fhl1</i>                       | Cell differentiation; cell growth; development; muscle development                                                                        | -6.649  | 0.139              |
| AI839950                       | Four and a half LIM domains 1 - <i>Fhl1</i>                       | Cell differentiation; cell growth; development; muscle development                                                                        | -3.590  | 0.318              |

**Table 1.** Genes modulated by C3 in keratinocytes. PolyA<sup>+</sup> RNA was prepared from primary mouse keratinocytes in low calcium medium after 6-h treatment with a GST-C3 fusion protein or GST control. cRNA probes were tested in duplicate by hybridization to Affimetrix U74A gene chips according to the manufacturer's recommendations. Probe sets with absent and/or marginal calls in both treated and controls were filtrated out. Probe sets with only one present call (either in treated or in control) were filtrated out if the present intensity value was less than 1,000 arbitrary units. Variations in gene expression between treated and controls were statistically analyzed by *Z* score determination (i.e., a measure of significance of variations in gene expression levels after local variance correction across the range of gene expression intensities) (1). Local *Z* scores were calculated for each replication and then averaged. Using relatively stringent criteria (average *Z* score >3 or < -3), 166 genes were identified which were induced and 109 genes that were suppressed in keratinocytes as a consequence of C3 treatment. Shown is a set of more relevant genes discussed in the text, together with corresponding average *Z* score values as well as folds of induction or suppression. A more detailed list can be provided upon request.

1. Colantuoni, C., Henry, G., Zeger, S., and Pevsner, J. (2002) *Bioinformatics* **18**, 1540-1541.
