# Supplementary material
Source: PubMed Central journal article supplement (PMC1183590)
Supplement: pnas_0505011102_3.pdf [file pnas_0505011102_3.pdf]

**Table 2. Genes oppositely modulated by C3 and by activated Rho/CRIK**

| GenBank accession number                                                                                       | Gene name                                                             | Gene function                                                                                                                                                                         | Z score C3 | Z score Rho | Z score CRIK-SK |
|----------------------------------------------------------------------------------------------------------------|-----------------------------------------------------------------------|---------------------------------------------------------------------------------------------------------------------------------------------------------------------------------------|------------|-------------|-----------------|
| <b>Genes up-regulated by C3 (Z score &gt; 1.96) and down-regulated by Rho and CRIK-SK (Z score &lt; -1.96)</b> |                                                                       |                                                                                                                                                                                       |            |             |                 |
| AI790103                                                                                                       | Interferon induced transmembrane protein 3-like - <i>Ifitm3l</i>      | Cellular component; integral to membrane                                                                                                                                              | 4.098      | -2.180      | -2.198          |
| M31885                                                                                                         | Inhibitor of DNA binding 1 - <i>Idb1</i>                              | Development; negative regulation of transcription from Pol II promoter; nucleus; regulation of angiogenesis                                                                           | 4.008      | -3.394      | -2.107          |
| AJ005559                                                                                                       | Small proline-rich protein 2A - <i>Spr2a</i>                          | Structural molecule activity and constituent of cytoskeleton; cornified envelope                                                                                                      | 3.671      | -11.028     | -2.284          |
| M81445                                                                                                         | Gap junction membrane channel protein $\beta$ 2 - <i>Gjb2</i>         | Gap-junction forming channel activity; protein binding; connexon channel activity                                                                                                     | 7.622      | -3.556      | -5.404          |
| AI851218                                                                                                       | RIKEN cDNA 4933409L06 gene                                            |                                                                                                                                                                                       | 2.222      | -2.349      | -3.399          |
| <b>Genes down-regulated by C3 (Z score &lt; -1.96) and up-regulated by Rho and CRIK-SK (Z score &gt; 1.96)</b> |                                                                       |                                                                                                                                                                                       |            |             |                 |
| D88793                                                                                                         | Cysteine and glycine-rich protein 1 - <i>Csrp1</i>                    | Actin cytoskeleton; actin cytoskeleton organization and biogenesis; nucleus; protein binding; zinc ion binding                                                                        | -2.024     | 8.764       | 2.464           |
| U88588                                                                                                         | Cerebellar degeneration-related 2 - <i>Cdr2</i>                       |                                                                                                                                                                                       | -2.686     | 2.144       | 2.142           |
| U51805                                                                                                         | Arginase 1, liver - <i>Arg1</i>                                       | Arginase activity; arginase activity; catalytic activity; hydrolase activity; manganese ion binding                                                                                   | -4.201     | 4.168       | 2.033           |
| AI836423                                                                                                       | Proteasome (prosome, macropain) 26S subunit, ATPase, 6 - <i>Psmc6</i> | ATP binding; ATPase activity; cytosol; nucleotide binding; nucleus; proteasome complex (sensu Eukarya)                                                                                | -2.281     | 1.995       | 2.247           |
| Z19543                                                                                                         | Calponin 2 - <i>Cnn2</i>                                              | Actin binding; calmodulin binding; smooth muscle contraction                                                                                                                          | -2.581     | 5.069       | 3.014           |
| AI845237                                                                                                       | Chloride intracellular channel 4 (mitochondrial) - <i>Clic4</i>       | Chloride channel activity; chloride transport; integral to membrane; ion channel activity; ion transport; voltage-gated chloride channel activity; voltage-gated ion channel activity | -2.317     | 3.479       | 1.964           |

|          |                                                                               |                                                                                                                                                                                                                                                                                                       |        |       |       |
|----------|-------------------------------------------------------------------------------|-------------------------------------------------------------------------------------------------------------------------------------------------------------------------------------------------------------------------------------------------------------------------------------------------------|--------|-------|-------|
| X95591   | Nuclear DNA binding protein - <i>Cld</i>                                      | DNA binding; ligand-dependent nuclear receptor interactor activity; negative regulation of transcription; protein binding; transcription corepressor activity;                                                                                                                                        | -2.101 | 2.321 | 2.579 |
| AW048944 | Protein kinase C, $\delta$ binding protein - <i>Prkcdbp</i>                   |                                                                                                                                                                                                                                                                                                       | -5.046 | 7.923 | 8.357 |
| L29468   | Cofilin 2, muscle - <i>Cfl2</i>                                               | Actin binding; cytoskeleton; intracellular; nucleus                                                                                                                                                                                                                                                   | -2.687 | 4.504 | 2.127 |
| AW124049 | DNA segment, Chr 5, ERATO Doi 593, expressed - <i>D5Ertd593e</i>              |                                                                                                                                                                                                                                                                                                       | -4.641 | 2.611 | 2.106 |
| AI195392 | Striamin - <i>Strm</i>                                                        | Actin binding; calcium ion binding                                                                                                                                                                                                                                                                    | -2.410 | 3.608 | 2.495 |
| AI843884 | DNA segment, Chr 6, ERATO Doi 32, expressed - <i>D6Ertd32e</i>                |                                                                                                                                                                                                                                                                                                       | -2.859 | 2.260 | 2.002 |
| D16250   | Bone morphogenetic protein receptor, type 1 <sup>o</sup> - <i>Bmpr1a</i>      | ATP binding; kinase activity; protein serine/threonine kinase activity; receptor activity; transferase activity; transforming growth factor $\beta$ receptor activity; transforming growth factor $\beta$ receptor signaling pathway; transmembrane receptor protein serine/threonine kinase activity | -2.005 | 2.219 | 2.145 |
| X16490   | Serine (or cysteine) proteinase inhibitor, clade B, member 2 - <i>Serpib2</i> | Serine-type endopeptidase inhibitor activity; plasminogen activator activity                                                                                                                                                                                                                          | -4.593 | 2.251 | 1.979 |
| AI837625 | Cysteine and glycine-rich protein 1 - <i>Csrp1</i>                            | Actin cytoskeleton; actin cytoskeleton organization and biogenesis; nucleus; protein binding; zinc ion binding                                                                                                                                                                                        | -2.222 | 9.541 | 3.894 |
| AI839417 | Moesin - <i>Msn</i>                                                           | Cytoskeletal protein binding; structural molecule activity                                                                                                                                                                                                                                            | -2.115 | 2.440 | 2.509 |
| AV138783 | Growth arrest and DNA-damage-inducible 45 $\beta$ - <i>Gadd45b</i>            | Activation of MAPKK; regulation of cell cycle; protein binding; apoptosis; cell differentiation; negative regulation of protein kinase activity                                                                                                                                                       | -9.001 | 3.087 | 2.171 |
| AA833425 | RIKEN cDNA 3110003A17 gene - <i>3110003A17Rik</i>                             |                                                                                                                                                                                                                                                                                                       | -2.009 | 3.189 | 2.436 |

|          |                                                         |                                                                                                                                                                     |        |        |       |
|----------|---------------------------------------------------------|---------------------------------------------------------------------------------------------------------------------------------------------------------------------|--------|--------|-------|
| AW061337 | Adenylate kinase 4 - <i>Ak4</i>                         | ATP binding; GTP binding; adenylate kinase activity; kinase activity; mitochondrion; phosphotransferase activity, phosphate group as acceptor; transferase activity | -2.064 | 2.760  | 4.312 |
| U41739   | Four and a half LIM domains 1 - <i>Fhll</i>             | Cell differentiation; cell growth; development; muscle development                                                                                                  | -6.649 | 9.203  | 4.354 |
| AI839950 | Four and a half LIM domains 1 - <i>Fhll</i>             | Cell differentiation; cell growth; development; muscle development                                                                                                  | -3.590 | 7.597  | 2.312 |
| AF033017 | Potassium channel, subfamily K, member 1 - <i>Kcnk1</i> | Voltage-gated ion channel activity; Ion channel activity; Potassium channel activity                                                                                | -3.090 | 2.571  | 3.406 |
| X13297   | Actin, $\alpha$ 2, smooth muscle, aorta - <i>Acta2</i>  | Cytoskeleton; cytoskeleton organization and biogenesis; structural constituent of cytoskeleton                                                                      | -5.702 | 10.484 | 4.862 |

**Table 2.** Genes oppositely modulated by C3 and by activated Rho/CRIK in keratinocytes. PolyA+ RNA was prepared from primary mouse keratinocytes in low calcium medium after 48-h infection with recombinant adenoviruses expressing RhoV14, CRIK-SK or GFP control. cRNA probes were tested in duplicate by hybridization to Affimetrix U74A gene chips as in the previous experiment, and data were similarly collected and analyzed. Less stringent but still statistically significant criteria ( $Z$  score  $>1.96$  or  $< -1.96$ ) (1) were adopted for a comparative analysis and more comprehensive identification of genes that are oppositely regulated by C3 treatment and activated by RhoA and CRIK expression in keratinocytes. Shown are all genes that were identified by this analysis, together with corresponding  $Z$  score values as well as folds of induction or suppression.

1. Quackenbush, J. (2002) *Nat Genet.* **32**, Suppl, 496-501.
